# Supplementary material for: SDS-assisted solvothermal synthesis of rose-like BiOBr partially enclosed by {111} facets and enhanced visible-light photocatalytic activity
Source: Royal Society of Chemistry journal article supplement (doi:10.1039/c5dt03315b), 2015-01-01
Supplement: c5dt03315b1.pdf [file c5dt03315b1.pdf]

## Supplementary Information

### SDS-assisted solvothermal synthesis of rose-like BiOBr partially enclosed by {111} facets and enhanced visible-light photocatalytic activity

Yang Zhao<sup>a,§</sup>, Tao Yu<sup>a,c,d,\*§</sup>, Xin Tan<sup>b</sup>, Chuang Xie<sup>a,d</sup>, Shucong Wang<sup>e</sup>

<sup>a</sup>*School of Chemical Engineering and Technology, Tianjin University, Tianjin 300072, P.R. China*

<sup>b</sup>*School of Science, Tibet University, Lhasa 850000, P.R. China*

<sup>c</sup>*Tianjin University-National Institute for Materials Science Joint Research Center, Tianjin University, Tianjin 300072, P.R. China*

<sup>d</sup>*Collaborative Innovation Center of Chemical Science and Engineering (Tianjin), Tianjin 300072, P.R. China*

<sup>e</sup>*School of Environmental Science and Engineering, Tianjin University, Tianjin 300072, P.R. China*

§Yang Zhao and Tao Yu contributed equally to this work.

\*Corresponding author. Tel./Fax +86 2223502142.

E-mail addresses: yutao@tju.edu.cn, lisat0001@163.com (T.Yu).

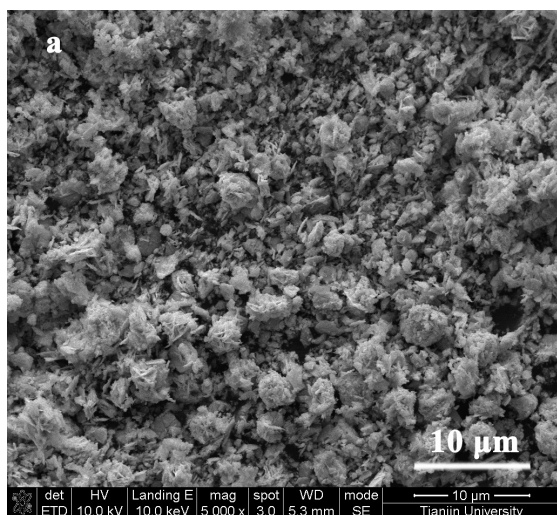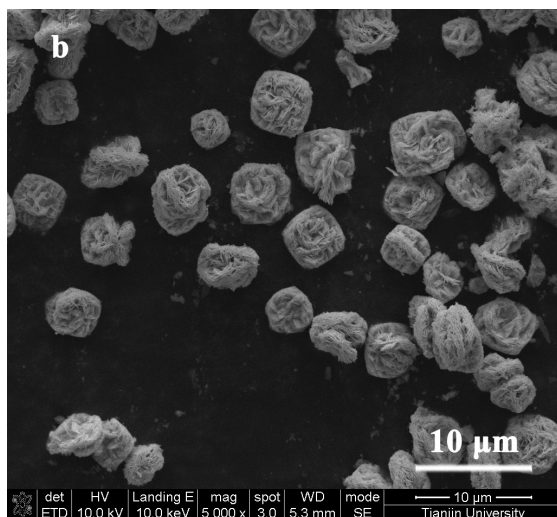

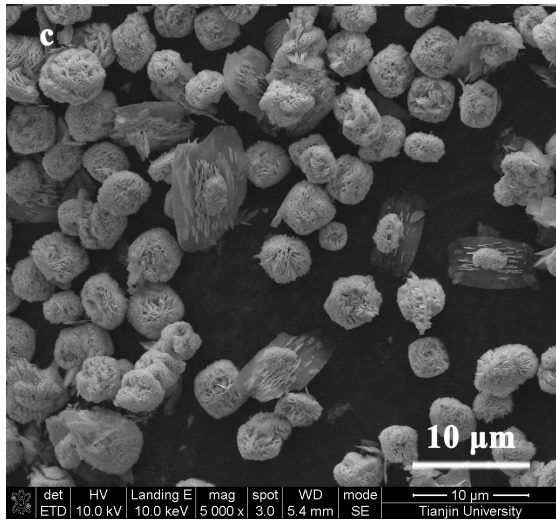

Fig. S1 SEM images of BiOBr-111 at different reaction time (a) 2h, (b) 4h, (c) 24h

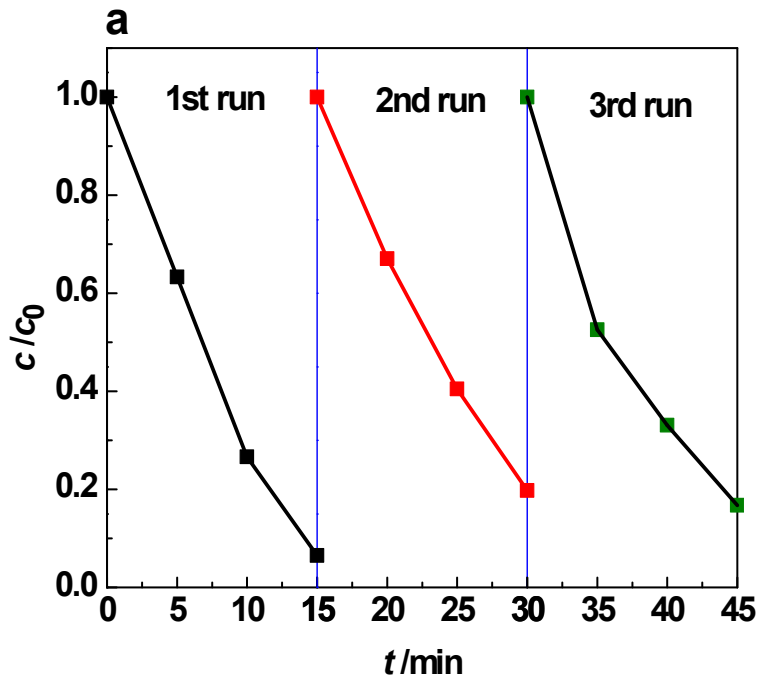

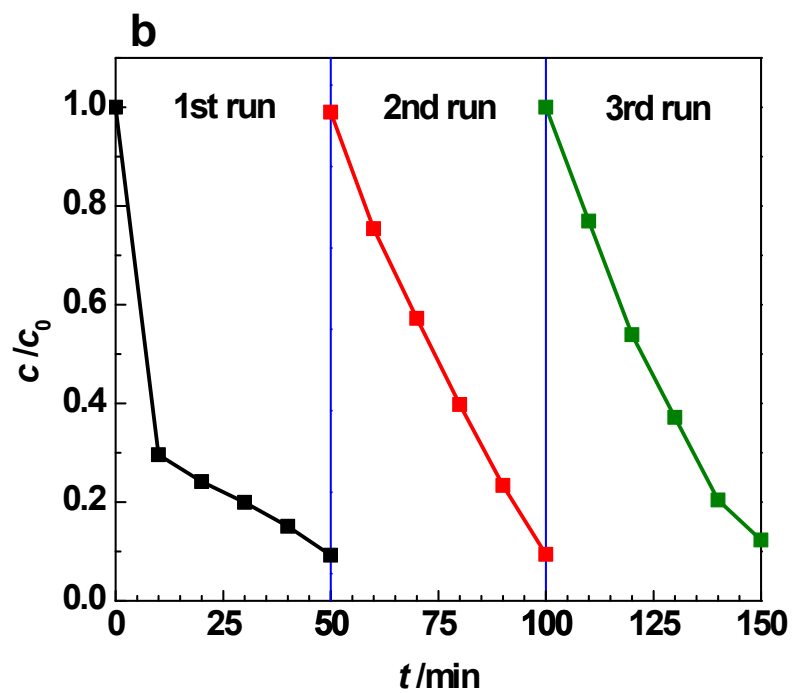

Fig. S2 (a) Cycle photodegradation of RhB; (b) cycle photodegradation of MO with BiOBr-111 under visible light( $\lambda \geq 420$  nm)
